# Supplementary material
Source: PubMed Central journal article supplement (PMC3993357)
Supplement: JB.01194-13_zjb999093118so1.pdf [file JB.01194-13_zjb999093118so1.pdf]

## **Supplemental Material**

### **Function and localization dynamics of bifunctional penicillin-binding proteins in *Caulobacter crescentus***

Wolfgang Strobel, Andrea Möll,  
Daniela Kiekebusch, Kathrin E. Klein, Martin Thanbichler

## SUPPLEMENTAL TABLES

**Table S1. Strains used in this study.**

| Strain                      | Genotype/description                                                                                                                                                                                     | Reference/source       |
|-----------------------------|----------------------------------------------------------------------------------------------------------------------------------------------------------------------------------------------------------|------------------------|
| <b><i>C. crescentus</i></b> |                                                                                                                                                                                                          |                        |
| CB15N                       | synchronizable derivative of wild-type strain CB15                                                                                                                                                       | Evinger & Agabian (1)  |
| CJW1715                     | CB15N <i>mreB</i> <sub>Q26P</sub>                                                                                                                                                                        | Aaron et al. (2)       |
| AM52                        | CB15N $\Delta$ <i>vanA</i> Pvan::Pvan-ftsN $\Delta$ <i>ftsN</i>                                                                                                                                          | Möll & Thanbichler (3) |
| AM160                       | CB15N <i>ftsN</i> :: <i>ecfp-ftsN</i> P <sub>xyl</sub> ::P <sub>xyl-ftsZ-eyfp</sub>                                                                                                                      | Möll & Thanbichler (3) |
| AM372                       | CB15N $\Delta$ <i>pbp1a</i> $\Delta$ <i>pbpY</i>                                                                                                                                                         | This work              |
| AM373                       | CB15N $\Delta$ <i>pbp1a</i> $\Delta$ <i>pbpZ</i>                                                                                                                                                         | This work              |
| AM457                       | CB15N P <sub>xyl</sub> ::P <sub>xyl-venus-pbpY</sub>                                                                                                                                                     | This work              |
| AM458                       | CB15N P <sub>xyl</sub> ::P <sub>xyl-venus-pbpZ</sub>                                                                                                                                                     | This work              |
| AM472                       | CB15N $\Delta$ <i>vanA</i> Pvan::Pvan-ftsN $\Delta$ <i>ftsN</i> P <sub>xyl</sub> ::P <sub>xyl-venus-pbpY</sub>                                                                                           | This work              |
| AM473                       | CB15N $\Delta$ <i>vanA</i> Pvan::Pvan-ftsN $\Delta$ <i>ftsN</i> P <sub>xyl</sub> ::P <sub>xyl-venus-pbpX</sub>                                                                                           | This work              |
| DK60                        | CB15N <i>ftsZ</i> :: <i>PiolC-ftsZ</i> '                                                                                                                                                                 | This work              |
| JK305                       | CB15N $\Delta$ <i>pbp1a</i> $\Delta$ <i>pbpC</i> $\Delta$ <i>pbpY</i> $\Delta$ <i>pbpZ</i>                                                                                                               | This work              |
| KK1                         | CB15N $\Delta$ <i>pbpX</i>                                                                                                                                                                               | This work              |
| KK12                        | CB15N $\Delta$ <i>pbp1a</i> $\Delta$ <i>pbpY</i> $\Delta$ <i>pbpZ</i>                                                                                                                                    | This work              |
| KK16                        | CB15N $\Delta$ <i>pbpY</i>                                                                                                                                                                               | This work              |
| KK17                        | CB15N $\Delta$ <i>pbpZ</i>                                                                                                                                                                               | This work              |
| KK18                        | CB15N $\Delta$ <i>pbp1a</i>                                                                                                                                                                              | This work              |
| KK24                        | CB15N $\Delta$ <i>pbpX</i> $\Delta$ <i>pbpZ</i>                                                                                                                                                          | This work              |
| KK33                        | CB15N P <sub>xyl</sub> ::P <sub>xyl-venus-pbp1a</sub>                                                                                                                                                    | This work              |
| KK37                        | CB15N $\Delta$ <i>pbpY</i> $\Delta$ <i>pbpZ</i>                                                                                                                                                          | This work              |
| MT56                        | CB15N <i>ftsN</i> :: <i>ecfp-ftsN</i> P <sub>xyl</sub> ::P <sub>xyl-mreB-eyfp</sub>                                                                                                                      | This work              |
| MT258                       | CB15N $\Delta$ <i>dipM</i>                                                                                                                                                                               | Möll et al. (4)        |
| MT278                       | CB15N P <sub>xyl</sub> ::P <sub>xyl-venus-pbpX</sub>                                                                                                                                                     | This work              |
| MT279                       | CB15N P <sub>xyl</sub> ::P <sub>xyl-venus-pbpC</sub>                                                                                                                                                     | Kühn et al. (5)        |
| MT282                       | CB15N $\Delta$ <i>pbpC</i>                                                                                                                                                                               | This work              |
| WS041                       | CB15N $\Delta$ <i>pbp1a</i> $\Delta$ <i>pbpX</i> P <sub>xyl</sub> ::P <sub>xyl-pbpX</sub>                                                                                                                | This work              |
| WS044                       | CB15N $\Delta$ <i>pbpX</i> $\Delta$ <i>pbpY</i> P <sub>xyl</sub> ::P <sub>xyl-pbpX</sub>                                                                                                                 | This work              |
| WS045                       | CB15N <i>venus-pbpY</i>                                                                                                                                                                                  | This work              |
| WS055                       | CB15N <i>venus-pbpX</i>                                                                                                                                                                                  | This work              |
| WS056                       | CB15N $\Delta$ <i>pbp1a</i> $\Delta$ <i>pbpC</i> $\Delta$ <i>pbpX</i> $\Delta$ <i>pbpY</i> $\Delta$ <i>pbpZ</i> P <sub>xyl</sub> ::P <sub>xyl-pbpX</sub>                                                 | This work              |
| WS057                       | CB15N $\Delta$ <i>dipM</i> P <sub>xyl</sub> ::P <sub>xyl-venus-pbpY</sub>                                                                                                                                | This work              |
| WS058                       | CB15N $\Delta$ <i>dipM</i> P <sub>xyl</sub> ::P <sub>xyl-venus-pbpX</sub>                                                                                                                                | This work              |
| WS062                       | CB15N <i>ftsZ</i> :: <i>PiolC-ftsZ</i> P <sub>xyl</sub> ::P <sub>xyl-venus-pbpX</sub>                                                                                                                    | This work              |
| WS063                       | CB15N <i>ftsZ</i> :: <i>PiolC-ftsZ</i> P <sub>xyl</sub> ::P <sub>xyl-venus-pbpY</sub>                                                                                                                    | This work              |
| WS064                       | CB15N $\Delta$ <i>pbp1a</i> $\Delta$ <i>pbpC</i> $\Delta$ <i>pbpX</i> $\Delta$ <i>pbpY</i> $\Delta$ <i>pbpZ</i> P <sub>xyl</sub> ::P <sub>xyl-pbpX</sub> P <sub>iol</sub> ::P <sub>iol-venus-pbpX</sub>  | This work              |
| WS065                       | CB15N $\Delta$ <i>pbp1a</i> $\Delta$ <i>pbpC</i> $\Delta$ <i>pbpX</i> $\Delta$ <i>pbpY</i> $\Delta$ <i>pbpZ</i> P <sub>xyl</sub> ::P <sub>xyl-pbpX</sub> P <sub>iol</sub> ::P <sub>iol-venus-pbpY</sub>  | This work              |
| WS066                       | CB15N $\Delta$ <i>pbp1a</i> $\Delta$ <i>pbpC</i> $\Delta$ <i>pbpX</i> $\Delta$ <i>pbpY</i> $\Delta$ <i>pbpZ</i> P <sub>xyl</sub> ::P <sub>xyl-pbpX</sub> P <sub>iol</sub> ::P <sub>iol-venus-pbp1a</sub> | This work              |
| WS067                       | CB15N $\Delta$ <i>pbp1a</i> $\Delta$ <i>pbpC</i> $\Delta$ <i>pbpX</i> $\Delta$ <i>pbpY</i> $\Delta$ <i>pbpZ</i> P <sub>xyl</sub> ::P <sub>xyl-pbpX</sub> P <sub>iol</sub> ::P <sub>iol-venus-pbpC</sub>  | This work              |
| WS068                       | CB15N $\Delta$ <i>pbp1a</i> $\Delta$ <i>pbpC</i> $\Delta$ <i>pbpX</i> $\Delta$ <i>pbpY</i> $\Delta$ <i>pbpZ</i> P <sub>xyl</sub> ::P <sub>xyl-pbpX</sub> P <sub>iol</sub> ::P <sub>iol-venus-pbpZ</sub>  | This work              |
| WS070                       | CB15N $\Delta$ <i>pbp1a</i> $\Delta$ <i>pbpC</i> $\Delta$ <i>pbpX</i> $\Delta$ <i>pbpY</i> $\Delta$ <i>pbpZ</i> P <sub>xyl</sub> ::P <sub>xyl-pbpX</sub> P <sub>iol</sub> ::P <sub>iol-pbpX</sub>        | This work              |
| WS071                       | CB15N $\Delta$ <i>pbp1a</i> $\Delta$ <i>pbpC</i> $\Delta$ <i>pbpX</i> $\Delta$ <i>pbpY</i> $\Delta$ <i>pbpZ</i> P <sub>xyl</sub> ::P <sub>xyl-pbpX</sub> P <sub>iol</sub> ::P <sub>iol-pbpY</sub>        | This work              |
| WS072                       | CB15N $\Delta$ <i>pbp1a</i> $\Delta$ <i>pbpC</i> $\Delta$ <i>pbpX</i> $\Delta$ <i>pbpY</i> $\Delta$ <i>pbpZ</i> P <sub>xyl</sub> ::P <sub>xyl-pbpX</sub> P <sub>iol</sub> ::P <sub>iol-pbp1a</sub>       | This work              |
| WS073                       | CB15N $\Delta$ <i>pbp1a</i> $\Delta$ <i>pbpC</i> $\Delta$ <i>pbpX</i> $\Delta$ <i>pbpY</i> $\Delta$ <i>pbpZ</i> P <sub>xyl</sub> ::P <sub>xyl-pbpX</sub> P <sub>iol</sub> ::P <sub>iol-pbpC</sub>        | This work              |
| WS074                       | CB15N $\Delta$ <i>pbp1a</i> $\Delta$ <i>pbpC</i> $\Delta$ <i>pbpX</i> $\Delta$ <i>pbpY</i> $\Delta$ <i>pbpZ</i> P <sub>xyl</sub> ::P <sub>xyl-pbpX</sub> P <sub>iol</sub> ::P <sub>iol-pbpZ</sub>        | This work              |
| WS075                       | CB15N $\Delta$ <i>pbp1a</i> $\Delta$ <i>pbpC</i> $\Delta$ <i>pbpX</i> $\Delta$ <i>pbpY</i> $\Delta$ <i>pbpZ</i> P <sub>xyl</sub> ::P <sub>xyl-pbpX</sub> P <sub>iol</sub> ::P <sub>iol-venus</sub>       | This work              |
| WS076                       | CB15N $\Delta$ <i>pbp1a</i> $\Delta$ <i>pbpC</i> $\Delta$ <i>pbpX</i> $\Delta$ <i>pbpY</i> $\Delta$ <i>pbpZ</i> P <sub>xyl</sub> ::P <sub>xyl-pbpX</sub> P <sub>iol</sub> ::pAMIOL-4                     | This work              |
| WS084                       | CB15N <i>mreB</i> <sub>Q26P</sub> P <sub>xyl</sub> ::P <sub>xyl-venus-pbpX</sub>                                                                                                                         | This work              |
| WS085                       | CB15N <i>mreB</i> <sub>Q26P</sub> P <sub>xyl</sub> ::P <sub>xyl-venus-pbpY</sub>                                                                                                                         | This work              |
| WS090                       | CB15N $\Delta$ <i>pbp1a</i> $\Delta$ <i>pbpX</i> $\Delta$ <i>pbpY</i> $\Delta$ <i>pbpZ</i> P <sub>xyl</sub> ::P <sub>xyl-pbpX</sub>                                                                      | This work              |
| <b><i>E. coli</i></b>       |                                                                                                                                                                                                          |                        |
| TOP10                       | cloning strain                                                                                                                                                                                           | Invitrogen             |
| XL1-Blue                    | cloning strain                                                                                                                                                                                           | Stratagene             |
| BTH101                      | bacterial two-hybrid reporter strain                                                                                                                                                                     | Karimova et al. (6)    |

**Table S2. Plasmids used in this study.**

| Plasmid  | Genotype/description                                                                                                   | Reference/source          |
|----------|------------------------------------------------------------------------------------------------------------------------|---------------------------|
| pKT25    | Plasmid for constructing C-terminal fusions to T25, Kan <sup>R</sup>                                                   | Karimova et al. (6)       |
| pUT18C   | Plasmid for constructing C-terminal fusions to T18, Amp <sup>R</sup>                                                   | Euromedex                 |
| pVCFPN-4 | Integrating plasmid used for creating N-terminal fusions to eCFP under the control of <i>Pvan</i> , Gent <sup>R</sup>  | Thanbichler et al. (7)    |
| pVVENN-1 | Integrating plasmid used for creating N-terminal fusions to Venus under the control of <i>Pvan</i> , Spec <sup>R</sup> | Thanbichler et al. (7)    |
| pVVENN-4 | Integrating plasmid used for creating N-terminal fusions to Venus under the control of <i>Pvan</i> , Gent <sup>R</sup> | Thanbichler et al. (7)    |
| pXCFPN-4 | Integrating plasmid used for creating N-terminal fusions to eCFP under the control of <i>Pxyl</i> , Gent <sup>R</sup>  | Thanbichler et al. (7)    |
| pXMCS-4  | Integrating plasmid for integrating <i>Pxyl</i> upstream of genes of interest                                          | Thanbichler et al. (7)    |
| pXVENN-1 | Integrating plasmid used for creating N-terminal fusions to Venus under the control of <i>Pxyl</i> , Spec <sup>R</sup> | Thanbichler et al. (7)    |
| pXVENN-2 | Integrating plasmid used for creating N-terminal fusions to Venus under the control of <i>Pxyl</i> , Kan <sup>R</sup>  | Thanbichler et al. (7)    |
| pNPTS138 | <i>sacB</i> -containing suicide vector for double homologous recombination, Kan <sup>R</sup>                           | M.R.K. Alley, unpublished |
| pAMIOL-4 | Integrating plasmid used for the expression of genes under the control of <i>Piol</i> , Gent <sup>R</sup>              | This work                 |
| pAM104   | pUT18C carrying <i>malG</i> (AA1-77)-'MAS'- <i>dipM</i> (AA26-609)                                                     | Möll et al. (4)           |
| pAM105   | pKT25 carrying <i>malG</i> (AA1-77)-'MAS'- <i>dipM</i> (AA26-609)                                                      | Möll et al. (4)           |
| pAM203   | pXVENN-2 carrying <i>pbpY</i>                                                                                          | This work                 |
| pAM211   | pXVENN-2 carrying <i>pbpZ</i>                                                                                          | This work                 |
| pDK122   | pXMCS-4 carrying <i>Piol</i> - <i>ftsZ</i> ', Gent <sup>R</sup>                                                        | This work                 |
| pKK001   | pXVENN-2 carrying <i>pbp1a</i>                                                                                         | This work                 |
| pKK004   | pNPTS138-based plasmid for constructing an in-frame deletion in <i>pbpX</i>                                            | This work                 |
| pKK007   | pNPTS138-based plasmid for constructing an in-frame deletion in <i>pbpY</i>                                            | This work                 |
| pKK009   | pNPTS138-based plasmid for constructing an in-frame deletion in <i>pbpZ</i>                                            | This work                 |
| pKK010   | pNPTS138-based plasmid for constructing an in-frame deletion in <i>pbp1a</i>                                           | This work                 |
| pMT921   | pNPTS138-based plasmid for constructing an in-frame deletion in <i>pbpC</i>                                            | This work                 |
| pMT898   | pXVENN-2 carrying <i>pbpX</i>                                                                                          | This work                 |
| pSS092   | pKT25 carrying <i>ftsL</i>                                                                                             | This work                 |
| pSS094   | pUT18C carrying <i>ftsL</i>                                                                                            | This work                 |
| pSS096   | pUT18C carrying <i>ftsN</i>                                                                                            | Möll et al. (4)           |
| pSS102   | pKT25 carrying <i>ftsN</i>                                                                                             | Möll et al. (4)           |
| pWS30    | pKT25 carrying <i>pbpX</i>                                                                                             | This work                 |
| pWS34    | pUT18C carrying <i>pbpX</i>                                                                                            | This work                 |
| pWS39    | pXVENN-1 carrying <i>pbpX</i> instead of <i>venus</i>                                                                  | This work                 |
| pWS40    | pVVENN-1 carrying <i>pbpX</i>                                                                                          | This work                 |
| pWS41    | pVVENN-1 carrying <i>pbpY</i>                                                                                          | This work                 |
| pWS42    | pKT25 carrying <i>pbp1a</i>                                                                                            | This work                 |
| pWS43    | pUT18C carrying <i>pbp1a</i>                                                                                           | This work                 |
| pWS48    | pKT25 carrying <i>pbpZ</i>                                                                                             | This work                 |
| pWS49    | pUT18C carrying <i>pbpZ</i>                                                                                            | This work                 |
| pWS50    | pVVENN-4 carrying <i>pbpX</i>                                                                                          | This work                 |
| pWS52    | pAMIOL-4 carrying <i>venus-pbpX</i>                                                                                    | This work                 |
| pWS58    | pNPTS138-based plasmid for replacing the native <i>pbpY</i> gene with <i>venus-pbpY</i>                                | This work                 |
| pWS59    | pNPTS138-based plasmid for replacing the native <i>pbpX</i> gene with <i>venus-pbpX</i>                                | This work                 |
| pWS60    | pAMIOL-4 carrying <i>venus-pbpY</i>                                                                                    | This work                 |
| pWS61    | pAMIOL-4 carrying <i>venus-pbp1a</i>                                                                                   | This work                 |
| pWS62    | pAMIOL-4 carrying <i>venus-pbpC</i>                                                                                    | This work                 |
| pWS63    | pAMIOL-4 carrying <i>venus-pbpZ</i>                                                                                    | This work                 |
| pWS64    | pUT18C carrying <i>pbpC</i>                                                                                            | This work                 |
| pWS65    | pKT25 carrying <i>pbpC</i>                                                                                             | This work                 |
| pWS66    | pUT18C carrying <i>pbpY</i>                                                                                            | This work                 |
| pWS67    | pKT25 carrying <i>pbpY</i>                                                                                             | This work                 |
| pWS68    | pAMIOL-4 carrying <i>pbpX</i>                                                                                          | This work                 |
| pWS69    | pAMIOL-4 carrying <i>pbpY</i>                                                                                          | This work                 |
| pWS70    | pAMIOL-4 carrying <i>pbp1a</i>                                                                                         | This work                 |
| pWS71    | pAMIOL-4 carrying <i>pbpC</i>                                                                                          | This work                 |
| pWS72    | pAMIOL-4 carrying <i>pbpZ</i>                                                                                          | This work                 |
| pWS73    | pAMIOL-4 carrying <i>venus</i>                                                                                         | This work                 |

**Table S3. Strain and plasmid construction.**

| Strain/Plasmid  | Construction                                                                                                                                                                                                                                                                                                                                                        |
|-----------------|---------------------------------------------------------------------------------------------------------------------------------------------------------------------------------------------------------------------------------------------------------------------------------------------------------------------------------------------------------------------|
| <b>Strains</b>  |                                                                                                                                                                                                                                                                                                                                                                     |
| AM372           | In-frame deletion of <i>pbp1a</i> in KK16 by double homologous recombination using pKK010                                                                                                                                                                                                                                                                           |
| AM373           | In-frame deletion of <i>pbp1a</i> in KK17 by double homologous recombination using pKK010                                                                                                                                                                                                                                                                           |
| AM457           | Integration of pAM203 in CB15N                                                                                                                                                                                                                                                                                                                                      |
| AM458           | Integration of pAM211 in CB15N                                                                                                                                                                                                                                                                                                                                      |
| AM472           | Integration of pAM203 in AM52                                                                                                                                                                                                                                                                                                                                       |
| AM473           | Transfer of P <sub>xyl</sub> ::P <sub>xyl</sub> - <i>venus-pbpX</i> from MT278 into AM52 by phage transduction                                                                                                                                                                                                                                                      |
| DK60            | Integration of pDK122 in CB15N                                                                                                                                                                                                                                                                                                                                      |
| JK305           | Deletion of <i>pbpC</i> in KK12 by double homologous recombination using pMT921                                                                                                                                                                                                                                                                                     |
| KK1             | Deletion of <i>pbpX</i> in CB15N by double homologous recombination using pKK004                                                                                                                                                                                                                                                                                    |
| KK12            | Deletion of <i>pbp1a</i> in KK37 by double homologous recombination using pKK010                                                                                                                                                                                                                                                                                    |
| KK16            | Deletion of <i>pbpY</i> in CB15N by double homologous recombination using pKK007                                                                                                                                                                                                                                                                                    |
| KK17            | Deletion of <i>pbpZ</i> in CB15N by double homologous recombination using pKK009                                                                                                                                                                                                                                                                                    |
| KK18            | Deletion of <i>pbp1a</i> in CB15N by double homologous recombination using pKK010                                                                                                                                                                                                                                                                                   |
| KK24            | Deletion of <i>pbpZ</i> in KK1 by double homologous recombination using pKK009                                                                                                                                                                                                                                                                                      |
| KK33            | Integration of pKK001 in CB15N                                                                                                                                                                                                                                                                                                                                      |
| KK37            | Deletion of <i>pbpZ</i> in KK16 by double homologous recombination using pKK009                                                                                                                                                                                                                                                                                     |
| MT278           | Integration of pMT898 in CB15N                                                                                                                                                                                                                                                                                                                                      |
| MT279           | Integration of pMT906 in CB15N                                                                                                                                                                                                                                                                                                                                      |
| MT282           | Integration of pMT921 in CB15N                                                                                                                                                                                                                                                                                                                                      |
| WS041           | Integration of pWS39 in KK18 and deletion of <i>pbpX</i> by double homologous recombination using pKK004                                                                                                                                                                                                                                                            |
| WS044           | Integration of pWS39 in KK16 and deletion of <i>pbpX</i> by double homologous recombination using pKK004                                                                                                                                                                                                                                                            |
| WS045           | Substitution of <i>pbpY</i> with <i>venus-pbpY</i> in CB15N by double homologous recombination using pWS58                                                                                                                                                                                                                                                          |
| WS055           | Substitution of <i>pbpX</i> with <i>venus-pbpX</i> in CB15N by double homologous recombination using pWS59                                                                                                                                                                                                                                                          |
| WS056           | Integration of pWS39 in JK305 and deletion of <i>pbpX</i> by double homologous recombination using pKK004                                                                                                                                                                                                                                                           |
| WS057           | Integration of pAM203 in MT258                                                                                                                                                                                                                                                                                                                                      |
| WS058           | Integration of pMT898 in MT258                                                                                                                                                                                                                                                                                                                                      |
| WS062           | Integration of pMT898 in DK60                                                                                                                                                                                                                                                                                                                                       |
| WS063           | Integration of pAM203 in DK60                                                                                                                                                                                                                                                                                                                                       |
| WS064           | Integration of pWS52 in WS056                                                                                                                                                                                                                                                                                                                                       |
| WS065           | Integration of pWS60 in WS056                                                                                                                                                                                                                                                                                                                                       |
| WS066           | Integration of pWS61 in WS056                                                                                                                                                                                                                                                                                                                                       |
| WS067           | Integration of pWS62 in WS056                                                                                                                                                                                                                                                                                                                                       |
| WS068           | Integration of pWS63 in WS056                                                                                                                                                                                                                                                                                                                                       |
| WS070           | Integration of pWS68 in WS056                                                                                                                                                                                                                                                                                                                                       |
| WS071           | Integration of pWS69 in WS056                                                                                                                                                                                                                                                                                                                                       |
| WS072           | Integration of pWS70 in WS056                                                                                                                                                                                                                                                                                                                                       |
| WS073           | Integration of pWS71 in WS056                                                                                                                                                                                                                                                                                                                                       |
| WS074           | Integration of pWS72 in WS056                                                                                                                                                                                                                                                                                                                                       |
| WS075           | Integration of pWS73 in WS056                                                                                                                                                                                                                                                                                                                                       |
| WS076           | Integration of pAMIOL-4 in WS056                                                                                                                                                                                                                                                                                                                                    |
| WS084           | Integration of pMT898 in CJW1715                                                                                                                                                                                                                                                                                                                                    |
| WS085           | Integration of pAM203 in CJW1715                                                                                                                                                                                                                                                                                                                                    |
| WS090           | Integration of pWS39 in KK12 and deletion of <i>pbpX</i> by double homologous recombination using pKK004                                                                                                                                                                                                                                                            |
| <b>Plasmids</b> |                                                                                                                                                                                                                                                                                                                                                                     |
| pAMIOL-4        | The upstream region of <i>cc1298 (iolC)</i> was PCR-amplified using primers <i>iolPuni_72f</i> and <i>iolPrev_73r</i> , cut with HindIII and AseI, and ligated into equally treated pXCFPN-4.                                                                                                                                                                       |
| pAM203          | <i>pbpY</i> was PCR-amplified from CB15N chrom. DNA using primers <i>pbpY_323f</i> and <i>oKK19</i> , cut with KpnI and NheI, and ligated into equally treated pXVENN-2.                                                                                                                                                                                            |
| pAM211          | <i>pbpZ</i> was PCR-amplified from CB15N chrom. DNA using primers <i>pbpZ_328f</i> and <i>oKK6</i> , cut with KpnI and NheI, and ligated into equally treated pXVENN-2.                                                                                                                                                                                             |
| pDK122          | The <i>iolC</i> promoter region was PCR-amplified from CB15N chrom. DNA using primers <i>PioIC3-for2</i> and <i>PioIC3-rev</i> and cut with HindIII and NdeI. <i>ftsZ</i> was PCR-amplified from CB15N chrom. DNA using primers <i>ftsZ-1</i> and <i>ftsZs-revNheI</i> and cut with NdeI and NheI. The fragments were triple-ligated into HindIII/NheI-cut pXMCS-4. |
| pKK001          | <i>pbp1a</i> was PCR-amplified from pMT705 using primers <i>oKK1</i> and <i>oKK2</i> , cut with KpnI and NheI, and ligated into equally treated pXVENN-2.                                                                                                                                                                                                           |
| pKK004          | The upstream and downstream regions of <i>pbpX</i> were PCR-amplified from CB15N chrom. DNA using primers <i>oKK7/oKK8</i> and <i>oKK9/oKK10</i> . The reaction products were treated with HindIII/BamHI and BamHI/EcoRI, respectively, and ligated into HindIII/EcoRI-cut pNPTS138.                                                                                |
| pKK007          | The upstream and downstream regions of <i>cc1875</i> were PCR-amplified from CB15N chrom. DNA using primers <i>oKK18/oKK19</i> and <i>oKK20/oKK21</i> . The reaction products were treated with HindIII/NheI and NheI/EcoRI, respectively, and ligated into HindIII/EcoRI-cut pNPTS138.                                                                             |
| pKK009          | The upstream and downstream regions of <i>cc3570</i> were PCR-amplified from CB15N chrom. DNA using primers <i>oKK27/oKK28</i> and <i>oKK29/oKK30</i> . The reaction products were treated with NheI/EcoRI and HindIII/EcoRI, respectively, and ligated into HindIII/NheI-cut pNPTS138.                                                                             |
| pKK010          | The upstream and downstream regions of <i>pbp1a</i> were PCR-amplified from CB15N chrom. DNA using primers <i>oKK23/oKK24</i> and <i>oKK25/oKK26</i> . The reaction products were treated with HindIII/EcoRI and NheI/EcoRI, respectively, and ligated into HindIII/NheI-cut pNPTS138.                                                                              |
| pSS092          | <i>ftsL</i> was PCR-amplified from CB15N chrom. DNA using primers <i>oSS192</i> and <i>oSS206</i> , cut with EcoRI and BglII, and ligated into equally treated pKT25.                                                                                                                                                                                               |
| pSS096          | <i>ftsL</i> was PCR-amplified from CB15N chrom. DNA using primers <i>oSS192</i> and <i>oSS206</i> , cut with EcoRI and BglII, and ligated into equally treated pUT18C.                                                                                                                                                                                              |

**Table S3. continued**

| Strain/Plasmid | Construction                                                                                                                                                                                                                                                                                                      |
|----------------|-------------------------------------------------------------------------------------------------------------------------------------------------------------------------------------------------------------------------------------------------------------------------------------------------------------------|
| pMT921         | Plasmid pMT906 was restricted with XcmI/BgIII, treated with T4 DNA polymerase and self-ligated. The <i>pbpC</i> gene bearing an in-frame deletion was isolated by restriction with KpnI/NheI and subsequent T4 polymerase treatment and ligated into EcoRV-cut pNPTS138. Aberrant XcmI/BgIII junction: CCACCCATC. |
| pMT906         | <i>pbpC</i> was PCR-amplified from CB15N chrom. DNA using primers <i>pbpC_for</i> and <i>pbpC_rev2</i> , cut with KpnI and NheI, and ligated into equally treated pXVENN-1.                                                                                                                                       |
| pMT898         | <i>pbpX</i> was PCR-amplified from CB15N chrom. DNA using primers <i>pbpX-for</i> and <i>pbpX-rev</i> , cut with BgIII and NheI, and ligated into equally treated pXVENN-1.                                                                                                                                       |
| pWS30          | <i>pbpX</i> was PCR-amplified from pMT898 using primers <i>pbpX_7f</i> and <i>pbpX_8r</i> , cut with KpnI and EcoRI, and ligated into equally treated pKT25.                                                                                                                                                      |
| pWS34          | <i>pbpX</i> was PCR-amplified from pMT898 using primers <i>pbpX_7f</i> and <i>pbpX_8r</i> , cut with KpnI and EcoRI, and ligated into equally treated pUT18C.                                                                                                                                                     |
| pWS39          | <i>pbpX</i> was isolated of pAM203 using NdeI/SacI and ligated into equally treated pXVENN-1.                                                                                                                                                                                                                     |
| pWS40          | <i>pbpX</i> was PCR-amplified from CB15N chrom. DNA using primers <i>pbpX_16f</i> and <i>pbpX_8r</i> , cut with KpnI and EcoRI and ligated into equally treated pVVENN-1.                                                                                                                                         |
| pWS41          | <i>pbpY</i> was PCR-amplified from pAM203 using primers <i>pbpY_323f</i> and <i>pbpY_337r</i> , cut with KpnI and EcoRI, and ligated into equally treated pVVENN-1.                                                                                                                                               |
| pWS42          | <i>pbp1a</i> was PCR-amplified from CB15N chrom. DNA using primers <i>pbp1a_17f</i> and <i>pbp1a_18r</i> , cut with KpnI and EcoRI, and ligated into equally treated pKT25.                                                                                                                                       |
| pWS43          | <i>pbp1a</i> was PCR-amplified from CB15N chrom. DNA using primers <i>pbp1a_17f</i> and <i>pbp1a_18r</i> , cut with KpnI and EcoRI, and ligated into equally treated pUT18C.                                                                                                                                      |
| pWS48          | <i>pbpZ</i> was PCR-amplified from CB15N chrom. DNA using primers <i>pbpZ_22f</i> and <i>cc3570_21r</i> , cut with KpnI and EcoRI, and ligated into equally treated pKT25.                                                                                                                                        |
| pWS49          | <i>pbpZ</i> was PCR-amplified from CB15N chrom. DNA using primers <i>pbpZ_22f</i> and <i>cc3570_21r</i> , cut with KpnI and EcoRI, and ligated into equally treated pUT18C.                                                                                                                                       |
| pWS50          | <i>pbpX</i> was PCR-amplified from CB15N chrom. DNA using primers <i>pbpX_16f</i> and <i>pbpX_8r</i> , cut with KpnI and EcoRI, and ligated into equally treated pVVENN-4.                                                                                                                                        |
| pWS52          | <i>venus-pbpX</i> was isolated from pWS50 by restriction with NdeI/EcoRI and ligated into AseI/EcoRI-treated pAMIOL-4.                                                                                                                                                                                            |
| pWS58          | <i>venus-pbpY</i> was isolated from pWS41 by restriction with NdeI/EcoRI. The upstream region of <i>pbpY</i> was PCR-amplified from CB15N chrom. DNA using primers <i>pbpY_27f</i> and <i>pbpY_26r</i> and cut with HindIII/NdeI. The two fragments were then triple-ligated into HindIII/EcoRI-cut pNPTS138.     |
| pWS59          | <i>venus-pbpX</i> was isolated from pWS40 by restriction with NdeI/EcoRI. The upstream region of <i>pbpX</i> was PCR-amplified from CB15N chrom. DNA using primers <i>pbpX_25f</i> and <i>pbpX_24r</i> and cut with HindIII/NdeI. The two fragments were then triple-ligated into HindIII/EcoRI-cut pNPTS138.     |
| pWS60          | <i>pbpY</i> was isolated of pWS41 using KpnI/EcoRI and ligated into equally treated pWS52.                                                                                                                                                                                                                        |
| pWS61          | <i>pbp1a</i> was PCR-amplified from CB15N chrom. DNA using primers <i>pbp1a_29f</i> and <i>pbp1a_18r</i> , cut with KpnI and EcoRI, and ligated into equally treated pWS52.                                                                                                                                       |
| pWS62          | <i>pbpC</i> was PCR-amplified from CB15N chrom. DNA using primers <i>pbpC_30f</i> and <i>pbpC_31r</i> , cut with KpnI and EcoRI, and ligated into equally treated pWS52.                                                                                                                                          |
| pWS63          | <i>pbpZ</i> was PCR-amplified from CB15N chrom. DNA using primers <i>pbpZ_28f</i> and <i>cc3570_21r</i> , cut with KpnI and EcoRI, and ligated into equally treated pWS52.                                                                                                                                        |
| pWS64          | <i>pbpC</i> was PCR-amplified from CB15N chrom. DNA using primers <i>pbpC_32f</i> and <i>pbpC_31r</i> , cut with KpnI and EcoRI, and ligated into equally treated pUT18C.                                                                                                                                         |
| pWS65          | <i>pbpC</i> was PCR-amplified from CB15N chrom. DNA using primers <i>pbpC_32f</i> and <i>pbpC_31r</i> , cut with KpnI and EcoRI, and ligated into equally treated pKT25.                                                                                                                                          |
| pWS66          | <i>pbpY</i> was PCR-amplified from CB15N chrom. DNA using primers <i>pbpY_35f</i> and <i>pbpY_337r</i> , cut with KpnI and EcoRI, and ligated into equally treated pUT18C.                                                                                                                                        |
| pWS67          | <i>pbpY</i> was PCR-amplified from CB15N chrom. DNA using primers <i>pbpY_35f</i> and <i>pbpY_337r</i> , cut with KpnI and EcoRI, and ligated into equally treated pKT25.                                                                                                                                         |
| pWS68          | <i>pbpX</i> was PCR-amplified from CB15N chrom. DNA using primers <i>pbpX_36f</i> and <i>pbpX_8r</i> , cut with NdeI and EcoRI, and ligated into AseI/EcoRI-treated pAMIOL-4.                                                                                                                                     |
| pWS69          | <i>pbpY</i> was PCR-amplified from CB15N chrom. DNA using primers <i>pbpY_37f</i> and <i>pbpY_6r</i> , cut with NdeI and EcoRI, and ligated into AseI/EcoRI-treated pAMIOL-4.                                                                                                                                     |
| pWS70          | <i>pbp1a</i> was PCR-amplified from CB15N chrom. DNA using primers <i>pbp1a_38f</i> and <i>pbp1a_18r</i> , cut with NdeI and EcoRI, and ligated into AseI/EcoRI-treated pAMIOL-4.                                                                                                                                 |
| pWS71          | <i>pbpC</i> was PCR-amplified from CB15N chrom. DNA using primers <i>pbpC_39f</i> and <i>pbpC_31r</i> , cut with NdeI and EcoRI, and ligated into AseI/EcoRI-treated pAMIOL-4.                                                                                                                                    |
| pWS72          | <i>pbpZ</i> was PCR-amplified from CB15N chrom. DNA using primers <i>pbpZ_40f</i> and <i>pbpZ_21r</i> , cut with NdeI and EcoRI, and ligated into AseI/EcoRI-treated pAMIOL-4.                                                                                                                                    |
| pWS73          | pWS52 was restricted with KpnI/EcoRI, treated with T4 DNA polymerase, and self-ligated.                                                                                                                                                                                                                           |

**Table S4. Oligonucleotides**

Restriction sites are indicated by capital letters.

| Designation   | Sequence (5' - 3')                     |
|---------------|----------------------------------------|
| oKK1          | tatGGTACCatgtctgatctaccgacctgcagcga    |
| oKK2          | tataGCTAGCtcagggcgcggctccggc           |
| oKK6          | tataGCTAGCctattctccctgatccgacctggcg    |
| oKK7          | atAAGCCTtggcgctcatcagcagagatcgacc      |
| oKK8          | atGGATTCcggattcccccgaagggtccgttc       |
| oKK9          | atGGATCCgagcctcccggcggaccagttgc        |
| oKK10         | atGAATTCagcgcgagggccctgacgcttcgac      |
| oKK18         | aaatAAGCTTggcgttggcccagcgggtgtacatgc   |
| oKK19         | tttaaGCTAGCacacaaaagccggatccgctgagcggg |
| oKK20         | aaattGCTAGCgatcgccgacacaccgccacgccc    |
| oKK21         | atGAATTCaccggcgggtcagccagatcctgct      |
| oKK23         | aaatAAGCTTtggcaatgtccccaagcattcgg      |
| oKK24         | aaGAATTCgggaacgtcgtctcagggctcgta       |
| oKK25         | aaGAATTCcgcgtggcccccccggcggagc         |
| oKK26         | aatGCTAGCccgtaggccagatcgggcgttcg       |
| oKK27         | tttaAAGCTTcgtcagcagcgtcgtggtgccct      |
| oKK28         | aaGAATTCacgggcttcatccccaaaactca        |
| oKK29         | aaGAATTCgtgaccgcaaggtgcggaatcagg       |
| oKK30         | aaattGCTAGCggtcaagcaccatcaggtcggcc     |
| oSS192        | atGAATTCtcatcgcaacccccctggacttg        |
| oSS206        | atatAGATCTCatgacggcggctggcttcaatc      |
| pbpX-for      | tatAGATCTatggcgaacccttcggcgga          |
| pbpX-rev      | tataGCTAGCctagtagcggcaactgtccgcggc     |
| pbpX_7f       | atatGGTACCgatggcgaaccgaccttcgg         |
| pbpX_8r       | atatGAATTCctagtagcggcaactgtccgcgg      |
| pbpX_16f      | atatGGTACCatggcgaaccgaccttcggcgga      |
| pbpX_24r      | atatCATATGgatcgtattgtctaccgcacagac     |
| pbpX_25f      | atatAAGCTTgcttccgggttcacctccgg         |
| pbpX_36f      | atatCATATGgcgaaccgaccttcgg             |
| pbp1a_17f     | atatGGTACCgatgtctgatctaccgacctgcag     |
| pbp1a_18r     | atatGAATTCcagggcggcggctccg             |
| pbp1a_29f     | atatGGTACCatgtctgatctaccgacctgcag      |
| pbp1a_38f     | atatCATATGtctgatctaccgacctgcagac       |
| pbpY_6r       | atatGAATTCcagtaaaccccgtcagcggatc       |
| pbpY_26r      | atatCATATGgcgacctccgtcgaacggg          |
| pbpY_27f      | atatAAGCTTcggcactccggctccgac           |
| pbpY_35f      | atatGGTACCgatgatctgaaaccaccgaacgatg    |
| pbpY_37f      | atatCATATGgatctgaaaccaccgaacgatg       |
| pbpY_323f     | aGGTACCatggatctgaaaccaccgaacgatg       |
| pbpY_337r     | taGAATTCcagtaaaccccgtcagcggatcc        |
| pbpC_for      | ttGGTACCatgaacgactggacgctccccccta      |
| pbpC_rev2     | tataGCTAGCctagtagggcaggttccggggggc     |
| pbpC_30f      | atatGGTACCatgaacgactggacgctcccg        |
| pbpC_31r      | atatGAATTCctagtagggcaggttccggggg       |
| pbpC_32f      | atatGGTACCgatgaacgactggacgctcccg       |
| pbpC_39f      | atatCATATGaacgactggacgctcccg           |
| pbpZ_21r      | atatGAATTCctattctccctgatccgacctggc     |
| pbpZ_22f      | atatGGTACCgatgctatcccggacgacctgc       |
| pbpZ_28f      | atatGGTACCatgctatcccggacgacctgc        |
| pbpZ_40f      | atatCATATGtcatcccggacgacctgc           |
| pbpZ_328f     | aGGTACCatgctatcccggacgacctgcagggtc     |
| PiolC3-for2   | tatAAGCTTcaatcccactggaccatattgtcc      |
| PiolC3-rev    | tatCATATGtccggttccacgtcactctgcg        |
| ftsZ-1        | ttttCATATGgctatttcttccgcccgc           |
| ftsZs-revNheI | tatGCTAGCtacttcgaagtggaaaggcttgg       |
| cc3570_21r    | atatGAATTCctattctccctgatccgacctggc     |
| iolPuni_72f   | aaaAAGCTTgggaaacctgtacgcagagagtcgg     |
| iolPrev_73r   | tATTAATggttccacgtcactctgcgacctggc      |

**Table S5. Muropeptide analysis**

|                      |                         | Muropeptide composition of peptidoglycan isolated from the indicated strains (%) |          |       |                |             |             |
|----------------------|-------------------------|----------------------------------------------------------------------------------|----------|-------|----------------|-------------|-------------|
|                      | Relative PG content (%) | Tetra                                                                            | PentaGly | Penta | Tetra-PentaGly | Tetra-Tetra | Tetra-Penta |
| <b>WT</b>            | 100                     | 28                                                                               | 12       | 15    | 8              | 13          | 8           |
| <b>WS070</b> (PbpX)  | 111                     | 30                                                                               | 18       | 13    | 11             | 7           | 8           |
| <b>WS071</b> (PbpY)  | 65                      | 33                                                                               | 20       | 15    | 9              | 7           | 6           |
| <b>WS072</b> (Pbp1A) | 58                      | 26                                                                               | 23       | 20    | 8              | 5           | 5           |
| <b>WS073</b> (PbpC)  | 66                      | 24                                                                               | 21       | 14    | 12             | 9           | 7           |
| <b>WS074</b> (PbpZ)  | 34                      | 17                                                                               | 29       | 16    | 14             | 5           | 7           |

## SUPPLEMENTAL FIGURES

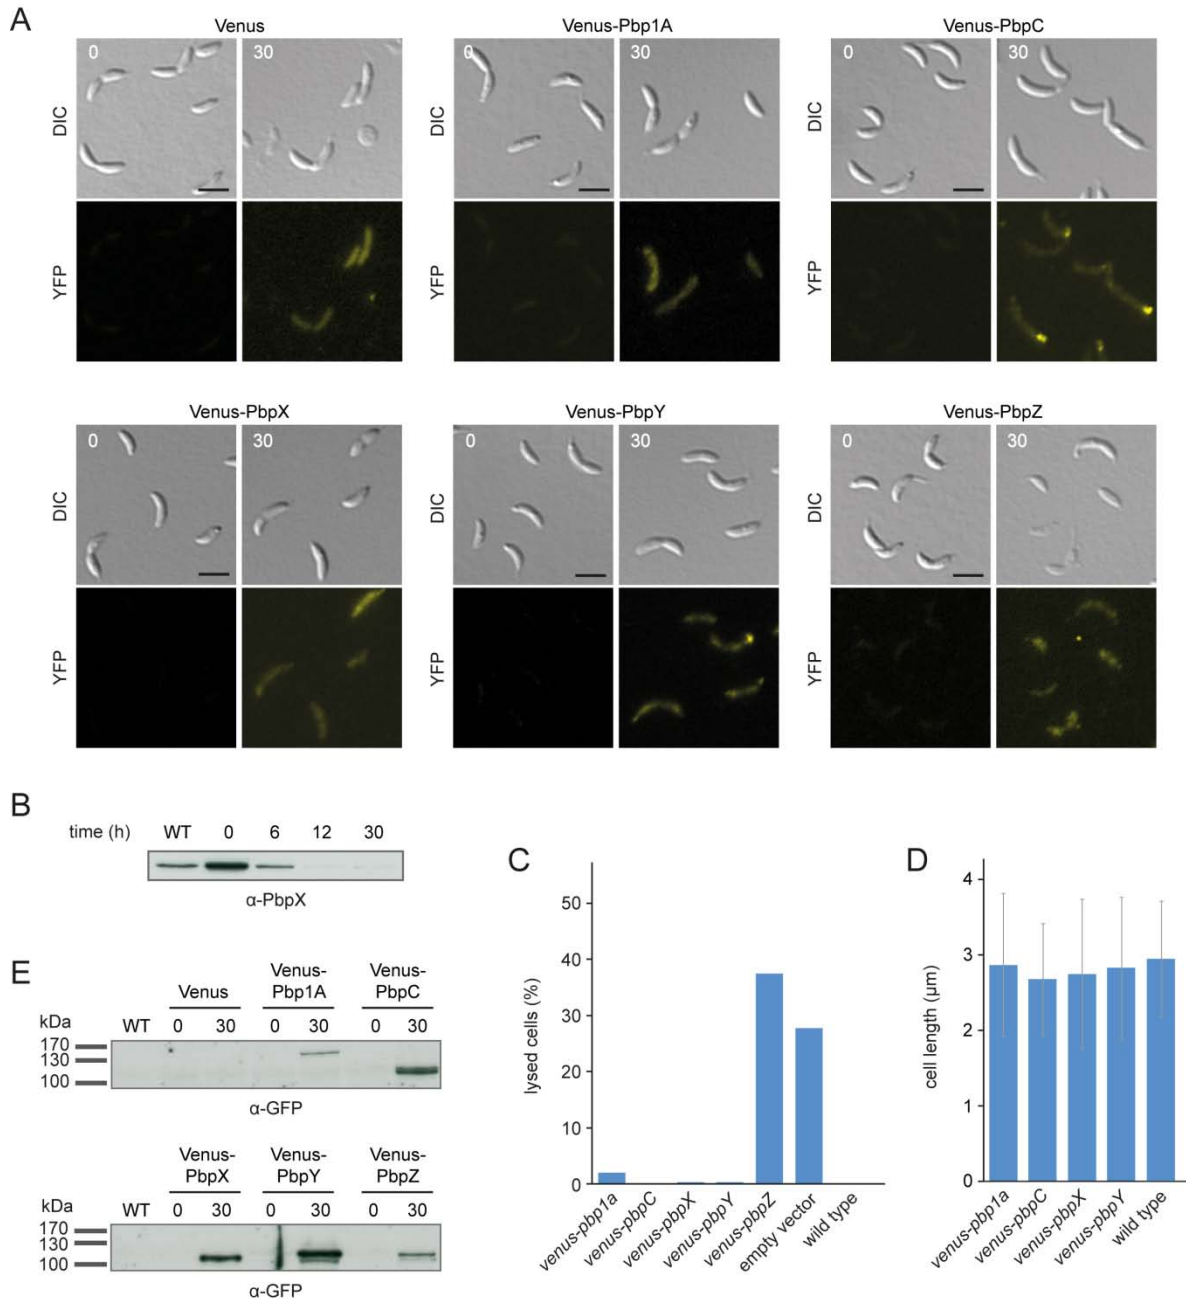

**Figure S1. Functionality of fluorescently tagged bBPB derivatives.** (A) Microscopic analysis of bBPB-deficient cells expressing single Venus-bBPB fusions. Strains carrying inositol-inducible copies of *venus* (WS075), *venus-pbp1a* (WS066), *venus-pbpC* (WS067), *venus-pbpX* (WS064), *venus-pbpY* (WS065) or *venus-pbpZ* (WS068) were grown in PYE medium containing 0.3 % xylose, washed, and transferred into PYE medium supplemented with 0.3 % myo-inositol ( $t = 0$  h) and cultivated for another 30 h. At the indicated time points, cells were analyzed by DIC and fluorescence microscopy. The cultures were diluted when necessary to ensure exponential growth throughout the course of the experiment. Scale bar: 3  $\mu\text{m}$ . (B) Time course of PbpX depletion. Cells of strain WS076 (CB15N  $\Delta pbp1a \Delta pbpC \Delta pbpX \Delta pbpY \Delta pbpZ$   $P_{xyI}::P_{xyI}-pbpX$   $P_{ioI}::pAMIOI-4$ ) were grown in PYE medium containing 0.3 % xylose, washed, and transferred into PYE medium containing 0.3 % myo-inositol ( $t = 0$  h). At the indicated time points, samples were taken and analyzed by immunoblotting with anti-PbpX antiserum. (C) Quantification of cell lysis in the cultures described in (A). At  $t = 30$  h, the fraction of lysed (ghost) cells was determined for each strain ( $n > 300$ ). (D) Average length of the cells in the cultures described in (A). Measurements were performed at  $t = 30$  h ( $n = 100$  per strain; error bars = SD). (E) Immunoblot analysis of the strains described in (A) at  $t = 0$  h and  $t = 30$  h.



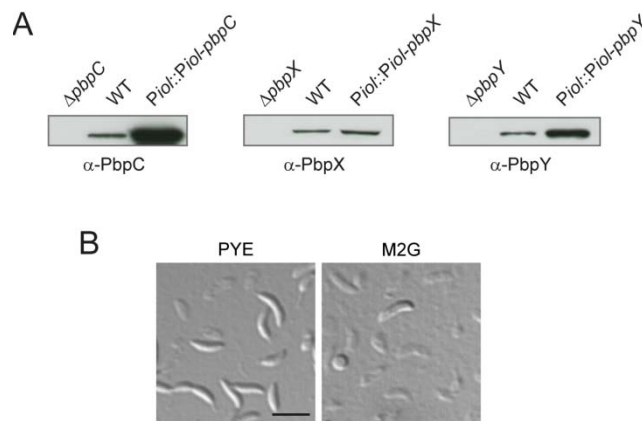

**Figure S2. Expression levels of bPBPs and complementation analysis with PbpC.** (A) Levels of PbpC, PbpX and PbpY upon expression from the native or inositol-inducible promoters. Strains CB15N (WT), WS073 ( $\Delta pbp1a \Delta pbpC \Delta pbpX \Delta pbpY \Delta pbpZ P_{xyI}::P_{xyI-pbpX} P_{iol}::P_{iol-pbpC}$ ), WS070 ( $\Delta pbp1a \Delta pbpC \Delta pbpX \Delta pbpY \Delta pbpZ P_{xyI}::P_{xyI-pbpX} P_{iol}::P_{iol-pbpX}$ ), and WS071 ( $\Delta pbp1a \Delta pbpC \Delta pbpX \Delta pbpY \Delta pbpZ P_{xyI}::P_{xyI-pbpX} P_{iol}::P_{iol-pbpY}$ ) were grown in PYE medium containing 0.3 % xylose, washed, and transferred into PYE medium containing 0.3 % myo-inositol. After 30 h of cultivation in exponential phase, samples were taken and analyzed by immunoblotting with the indicated antisera. Strains MT282 ( $\Delta pbpC$ ), KK1 ( $\Delta pbpX$ ) and KK16 ( $\Delta pbpY$ ) were used to control for the specificity of the antibodies. (B) Complementation analysis with PbpC. Cells of strain WS090 ( $\Delta pbp1a \Delta pbpX \Delta pbpY \Delta pbpZ P_{xyI}::P_{xyI-pbpX}$ ) were grown in PYE and M2G medium, respectively, containing 0.3 % xylose. Cells were washed, transferred into the same medium lacking inducer, and visualized by DIC microscopy after 45 h of exponential growth. Scale bar: 3  $\mu$ m.

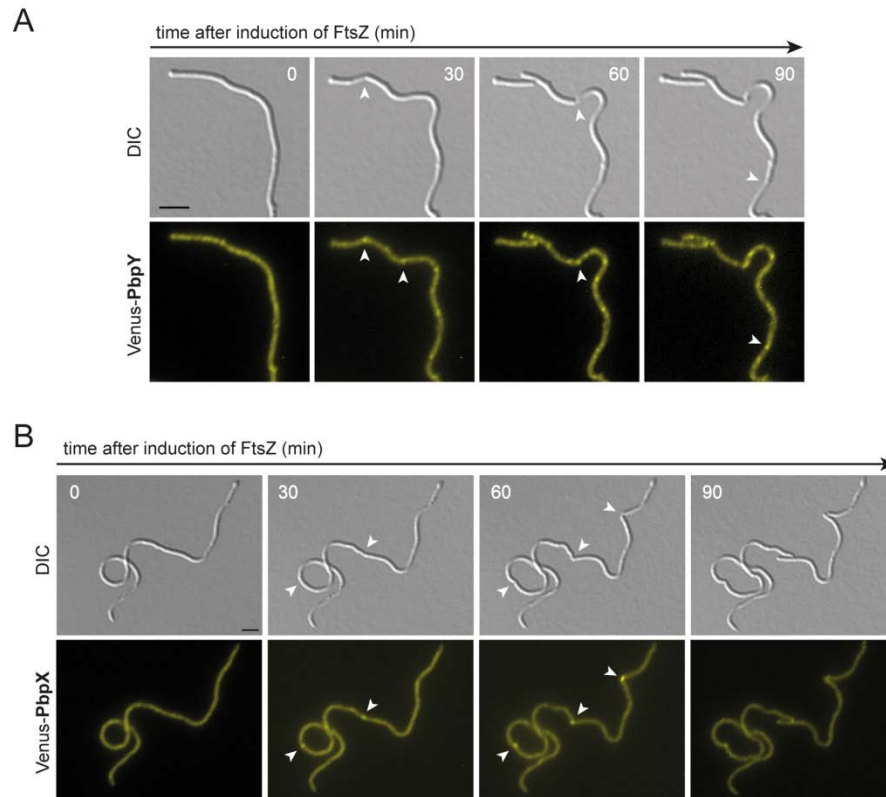

**Figure S3. Dependency of PbpX and PbpY midcell localization on the cell division protein FtsZ.** Cells of (A) strain WS062 (*ftsZ::P<sub>101</sub>-ftsZ P<sub>xyl</sub>::P<sub>xyl</sub>-venus-pbpX*) and (B) WS063 (*ftsZ::P<sub>101</sub>-ftsZ P<sub>xyl</sub>::P<sub>xyl</sub>-venus-pbpY*) were grown in M2G medium containing 0.3 % inositol, washed three times with M2 salts, and subsequently grown for 9 h in M2G medium lacking inducer to deplete FtsZ. Three hours prior to analysis, expression of *venus-pbpX* and *venus-pbpY*, respectively, was induced by addition of 0.3 % xylose. Cells were transferred onto M2G-agarose pads supplemented with 0.3 % xylose and 0.3 % inositol and visualized at the indicated time points by DIC and fluorescence microscopy. Scale bar: 3  $\mu$ m.

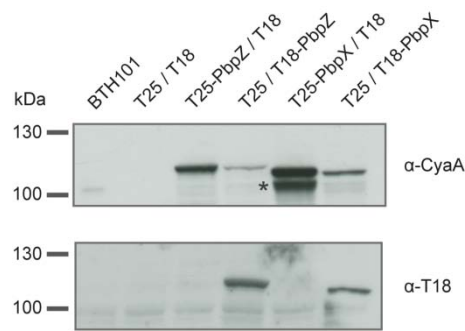

**Figure S4. Expression levels of bacterial two-hybrid fusion proteins.** Cells of *E. coli* BTH101 harboring pWS48 (pKT25-*pbpZ*), pWS49 (pUT18C-*pbpZ*), pWS30 (pKT25-*pbpX*), pWS34 (pUT18C-*pbpX*) or the empty pKT25 and pUT18C plasmids, respectively, were grown to exponential phase in LB medium supplemented with the respective antibiotics. Expression of the hybrid genes was induced with 0.5 mM IPTG for 3 h. Subsequently, samples were withdrawn and analyzed by immunoblotting with an anti-CyaA antibody (serum L24023 (8)), which recognizes both the T25 and, less efficiently, the T18 fragment ( $\alpha$ -CyaA), and a monoclonal antibody directed against the C-terminal region of the T18 fragment ( $\alpha$ -T18). The asterisk indicates a degradation product of T25-PbpX.

## SUPPLEMENTAL REFERENCES

1. Evinger M, Agabian N. 1977. Envelope-associated nucleoid from *Caulobacter crescentus* stalked and swarmer cells. *J. Bacteriol.* **132**:294-301.
2. Aaron M, Charbon G, Lam H, Schwarz H, Vollmer W, Jacobs-Wagner C. 2007. The tubulin homologue FtsZ contributes to cell elongation by guiding cell wall precursor synthesis in *Caulobacter crescentus*. *Mol. Microbiol.* **64**:938-952.
3. Möll A, Thanbichler M. 2009. FtsN-like proteins are conserved components of the cell division machinery in proteobacteria. *Mol. Microbiol.* **72**:1037-1053.
4. Möll A, Schlimpert S, Briegel A, Jensen GJ, Thanbichler M. 2010. DipM, a new factor required for peptidoglycan remodelling during cell division in *Caulobacter crescentus*. *Mol. Microbiol.* **77**:90-107.
5. Kühn J, Briegel A, Mörschel E, Kahnt J, Leser K, Wick S, Jensen GJ, Thanbichler M. 2010. Bactofilins, a ubiquitous class of cytoskeletal proteins mediating polar localization of a cell wall synthase in *Caulobacter crescentus*. *EMBO J.* **29**:327-339.
6. Karimova G, Pidoux J, Ullmann A, Ladant D. 1998. A bacterial two-hybrid system based on a reconstituted signal transduction pathway. *Proc. Natl. Acad. Sci. USA* **95**:5752-5756.
7. Thanbichler M, Iniesta AA, Shapiro L. 2007. A comprehensive set of plasmids for vanillate- and xylose-inducible gene expression in *Caulobacter crescentus*. *Nucleic Acids Res.* **35**:e137.
8. Robichon C, Karimova G, Beckwith J, Ladant D. 2011. Role of leucine zipper motifs in association of the *Escherichia coli* cell division proteins FtsL and FtsB. *J. Bacteriol.* **193**:4988-4992.
